# Supplementary material
Source: Springer Nature journal article supplement (https://www.springermedizin.de/resource/supplementary/12889_2012_5207_MOESM2_ESM.pdf/9494922)

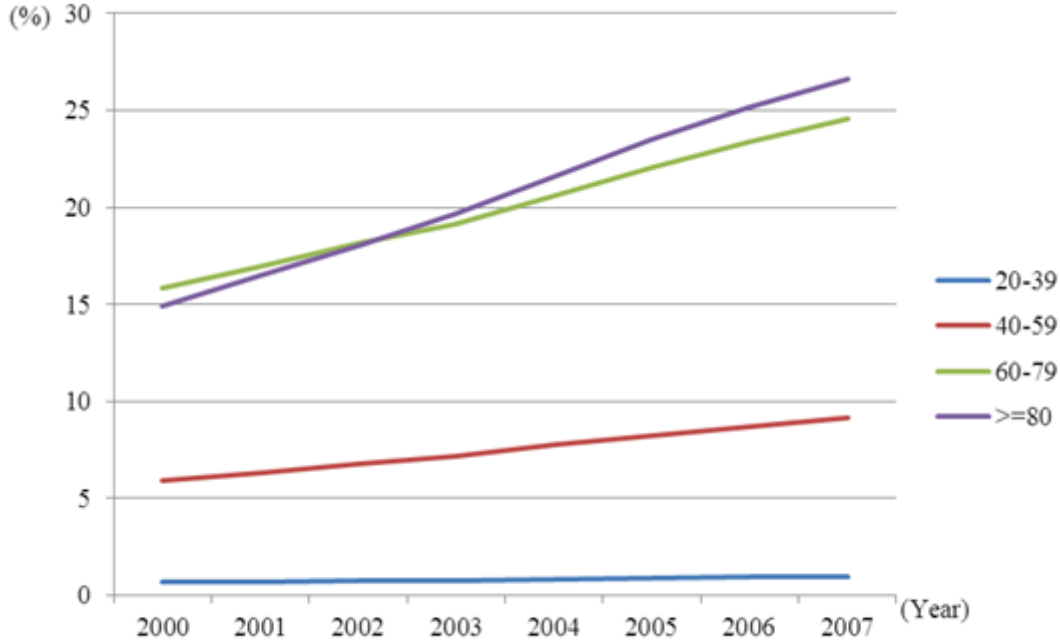

Supplement: MOESM2 [file 9494922]
